# Supplementary material for: Nature and strength of chalcogen–π bonds
Source: Royal Society of Chemistry journal article supplement (doi:10.1039/c8cp05922e), 2018-01-01
Supplement: c8cp05922e1.pdf [file c8cp05922e1.pdf]

# - SUPPLEMENTARY INFORMATION -

## Nature and Strength of Chalcogen– $\pi$ Bonds

Marco Bortoli,<sup>a</sup> Shah Masood Ahmad,<sup>a</sup> Trevor A. Hamlin,<sup>b</sup> F. Matthias Bickelhaupt<sup>\*b,c</sup>  
and Laura Orian<sup>\*a</sup>

- <sup>a</sup> Dipartimento di Scienze Chimiche Università degli Studi di Padova, Via Marzolo 1 35131 Padova, Italy. E-mail: laura.orian@unipd.it
- <sup>b</sup> Department of Theoretical Chemistry and Amsterdam Center for Multiscale Modeling (ACMM), Vrije Universiteit Amsterdam, De Boelelaan 1083, 1081 HV Amsterdam, The Netherlands. E-mail: f.m.bickelhaupt@vu.nl
- <sup>c</sup> Institute for Molecules and Materials (IMM), Radboud University, Heyendaalseweg 135, 6525 AJ Nijmegen, The Netherlands.

### Table of Contents

|                                                                                                                                                |    |
|------------------------------------------------------------------------------------------------------------------------------------------------|----|
| <b>Benchmark Data</b> .....                                                                                                                    | 2  |
| <b>Table S1</b> Chalcogen bond energies $\Delta E$ (in kcal mol <sup>-1</sup> ) computed with DFT and CCSD(T). ....                            | 2  |
| <b>Table S2.</b> Chalcogen bond energies $\Delta E$ (in kcal mol <sup>-1</sup> ) computed with DFT and CCSD(T). ....                           | 2  |
| <b>Orbitals</b> .....                                                                                                                          | 3  |
| <b>Table S3</b> HOMO-LUMO energy gap $\Delta\epsilon$ (in eV), overlap $S$ , and $S^2/\Delta\epsilon$ for the chalcogen- $\pi$ complexes. .... | 3  |
| <b>Structures</b> .....                                                                                                                        | 4  |
| <b>Table S4</b> Geometries of the stationary points for the unsaturated substrates. ....                                                       | 4  |
| <b>Table S5</b> Geometries of the stationary points for oxygen complexes. ....                                                                 | 5  |
| <b>Table S6</b> Geometries of the stationary points for sulfur complexes. ....                                                                 | 7  |
| <b>Table S7</b> Geometries of the stationary points for selenium complexes. ....                                                               | 9  |
| <b>Table S8</b> Geometries of the stationary points for tellurium complexes. ....                                                              | 11 |

## Benchmark Data

**Table S1** Chalcogen bond energies  $\Delta E$  (in kcal mol<sup>-1</sup>) computed with DFT and CC.<sup>[a]</sup>

| Complex                  | DFT   | CC   | Error $\Delta$ (DFT-CC) |
|--------------------------|-------|------|-------------------------|
| F <sub>2</sub> O•••ac    | -1.3  | 0.2  | -1.5                    |
| F <sub>2</sub> S•••ac    | -4.3  | -2.2 | -2.1                    |
| F <sub>2</sub> Te•••ac   | -9.4  | -5.7 | -3.7                    |
| F <sub>2</sub> Se•••ac   | -7.5  | -3.7 | -3.8                    |
| Cl <sub>2</sub> Se•••ac  | -5.3  | -2.7 | -2.6                    |
| Br <sub>2</sub> Se•••ac  | -5.0  | -2.5 | -2.5                    |
| I <sub>2</sub> Se•••ac   | -4.3  | -2.1 | -2.2                    |
| F <sub>2</sub> Se•••et   | -9.1  | -4.2 | -4.9                    |
| F <sub>2</sub> Se•••2but | -11.3 | -6.4 | -4.9                    |
| Average error            |       |      | -3.1                    |

[a] Computed with correction for basis-set superposition error. DFT = ZORA-BLYP-D3(BJ)/QZ4Pae//ZORA-BLYP-D3(BJ)/TZ2Psc. CC = DLPNO-CCSD(T)/aug-cc-pV5Z-DK, aug-cc-pVQZ-DK.

**Table S2.** Chalcogen bond energies  $\Delta E$  (in kcal mol<sup>-1</sup>) computed with DFT and CC.<sup>[a]</sup>

| Complex                  | DFT   | CC   | Error $\Delta$ (DFT-CC) |
|--------------------------|-------|------|-------------------------|
| F <sub>2</sub> O•••ac    | -1.3  | 0.1  | -1.4                    |
| F <sub>2</sub> S•••ac    | -4.3  | -2.3 | -2.0                    |
| F <sub>2</sub> Te•••ac   | -9.4  | -8.4 | -1.0                    |
| F <sub>2</sub> Se•••ac   | -7.5  | -4.6 | -2.9                    |
| Cl <sub>2</sub> Se•••ac  | -5.4  | -3.4 | -2.0                    |
| Br <sub>2</sub> Se•••ac  | -5.1  | -3.5 | -1.4                    |
| I <sub>2</sub> Se•••ac   | -4.4  | -3.8 | -0.6                    |
| F <sub>2</sub> Se•••et   | -9.1  | -5.6 | -3.5                    |
| F <sub>2</sub> Se•••2but | -11.4 | -7.9 | -3.5                    |
| Average error            |       |      | -2.0                    |

[a] Computed without correction for basis-set superposition error. DFT = ZORA-BLYP-D3(BJ)/QZ4Pae//ZORA-BLYP-D3(BJ)/TZ2Psc. CC = DLPNO-CCSD(T)/aug-cc-pV5Z-DK, aug-cc-pVQZ-DK.

## Orbitals

**Table S3** HOMO-LUMO energy gap  $\Delta\varepsilon$  (in eV), overlap  $S$ , and  $S^2/\Delta\varepsilon$  for the chalcogen- $\pi$  complexes.<sup>[a]</sup>

| Complex                  | $\Delta\varepsilon$ | $S$  | $(S^2/\Delta\varepsilon) \cdot 10^3$ | Complex                   | $\Delta\varepsilon$ | $S$  | $(S^2/\Delta\varepsilon) \cdot 10^3$ |
|--------------------------|---------------------|------|--------------------------------------|---------------------------|---------------------|------|--------------------------------------|
| F <sub>2</sub> O•••ac    | 1.84                | 0.06 | 1.95                                 | F <sub>2</sub> Se•••ac    | 3.03                | 0.17 | 9.54                                 |
| Cl <sub>2</sub> O•••ac   | 2.01                | 0.06 | 1.79                                 | Cl <sub>2</sub> Se•••ac   | 2.91                | 0.14 | 6.74                                 |
| Br <sub>2</sub> O•••ac   | 1.97                | 0.07 | 2.49                                 | Br <sub>2</sub> Se•••ac   | 2.75                | 0.13 | 6.14                                 |
| I <sub>2</sub> O•••ac    | 2.14                | 0.07 | 2.29                                 | I <sub>2</sub> Se•••ac    | 2.71                | 0.09 | 2.99                                 |
| F <sub>2</sub> O•••et    | 1.24                | 0.07 | 3.95                                 | F <sub>2</sub> Se•••et    | 2.39                | 0.19 | 15.09                                |
| Cl <sub>2</sub> O•••et   | 1.51                | 0.07 | 3.24                                 | Cl <sub>2</sub> Se•••et   | 2.40                | 0.15 | 9.37                                 |
| Br <sub>2</sub> O•••et   | 1.46                | 0.08 | 4.37                                 | Br <sub>2</sub> Se•••et   | 2.25                | 0.14 | 8.73                                 |
| I <sub>2</sub> O•••et    | 1.66                | 0.08 | 3.85                                 | I <sub>2</sub> Se•••et    | 2.22                | 0.13 | 7.60                                 |
| F <sub>2</sub> O•••2but  | 0.19                | 0.07 | 25.93                                | F <sub>2</sub> Se•••2but  | 1.63                | 0.17 | 17.78                                |
| Cl <sub>2</sub> O•••2but | 0.58                | 0.06 | 6.17                                 | Cl <sub>2</sub> Se•••2but | 1.55                | 0.12 | 9.29                                 |
| Br <sub>2</sub> O•••2but | 0.57                | 0.07 | 8.55                                 | Br <sub>2</sub> Se•••2but | 1.41                | 0.11 | 8.59                                 |
| I <sub>2</sub> O•••2but  | 0.83                | 0.07 | 5.91                                 | I <sub>2</sub> Se•••2but  | 1.40                | 0.08 | 4.58                                 |
| F <sub>2</sub> S•••ac    | 3.58                | 0.13 | 4.72                                 | F <sub>2</sub> Te•••ac    | 2.89                | 0.20 | 13.83                                |
| Cl <sub>2</sub> S•••ac   | 3.14                | 0.10 | 3.18                                 | Cl <sub>2</sub> Te•••ac   | 3.11                | 0.18 | 10.42                                |
| Br <sub>2</sub> S•••ac   | 2.84                | 0.10 | 3.52                                 | Br <sub>2</sub> Te•••ac   | 2.99                | 0.14 | 6.56                                 |
| I <sub>2</sub> S•••ac    | 2.74                | 0.08 | 2.33                                 | I <sub>2</sub> Te•••ac    | 2.92                | 0.12 | 4.93                                 |
| F <sub>2</sub> S•••et    | 3.00                | 0.16 | 8.52                                 | F <sub>2</sub> Te•••et    | 2.27                | 0.22 | 21.30                                |
| Cl <sub>2</sub> S•••et   | 2.67                | 0.11 | 4.53                                 | Cl <sub>2</sub> Te•••et   | 2.57                | 0.20 | 15.57                                |
| Br <sub>2</sub> S•••et   | 2.39                | 0.11 | 5.07                                 | Br <sub>2</sub> Te•••et   | 2.49                | 0.16 | 10.29                                |
| I <sub>2</sub> S•••et    | 2.28                | 0.10 | 4.39                                 | I <sub>2</sub> Te•••et    | 2.44                | 0.13 | 6.94                                 |
| F <sub>2</sub> S•••2but  | 2.09                | 0.14 | 9.40                                 | F <sub>2</sub> Te•••2but  | 1.55                | 0.18 | 20.96                                |
| Cl <sub>2</sub> S•••2but | 1.77                | 0.09 | 4.58                                 | Cl <sub>2</sub> Te•••2but | 1.75                | 0.16 | 14.65                                |
| Br <sub>2</sub> S•••2but | 1.49                | 0.08 | 4.30                                 | Br <sub>2</sub> Te•••2but | 1.66                | 0.12 | 8.66                                 |
| I <sub>2</sub> S•••2but  | 1.42                | 0.08 | 4.50                                 | I <sub>2</sub> Te•••2but  | 1.62                | 0.09 | 5.01                                 |

[a] Computed at ZORA-BLYP-D3(BJ)/QZ4Pae//ZORA-BLYP-D3(BJ)/TZ2Psc.

## Structures

**Table S4** Geometries of the stationary points for the unsaturated substrates. <sup>[a]</sup>

### 2-butyne

E = -1.99297282 Ha

|   |             |              |              |
|---|-------------|--------------|--------------|
| C | 2.418473000 | -0.375988000 | -0.605218000 |
| C | 2.418473000 | -0.375988000 | 0.605218000  |
| C | 2.418492000 | -0.375903000 | -2.068288000 |
| H | 3.441539000 | -0.388912000 | -2.466318000 |
| H | 1.895662000 | -1.255326000 | -2.466403000 |
| H | 1.918271000 | 0.516629000  | -2.466253000 |
| C | 2.418492000 | -0.375903000 | 2.068288000  |
| H | 1.895662000 | -1.255326000 | 2.466403000  |
| H | 3.441539000 | -0.388912000 | 2.466318000  |
| H | 1.918271000 | 0.516629000  | 2.466253000  |

### Ethylene

E = -1.13133289 Ha

|   |              |              |              |
|---|--------------|--------------|--------------|
| C | -1.840613000 | -0.753021000 | 0.006481000  |
| C | -1.840613000 | -0.753021000 | 1.339518000  |
| H | -1.840613000 | 0.172802000  | -0.565823000 |
| H | -1.840613000 | -1.678843000 | -0.565823000 |
| H | -1.840613000 | 0.172802000  | 1.911822000  |
| H | -1.840613000 | -1.678843000 | 1.911822000  |

### Acetylene

E = -0.8130827 Ha

|   |              |              |              |
|---|--------------|--------------|--------------|
| C | -0.021270000 | -0.267224000 | -0.934497000 |
| C | -0.021270000 | -0.267224000 | 0.270179000  |
| H | -0.021270000 | -0.267224000 | 1.337050000  |
| H | -0.021270000 | -0.267224000 | -2.001368000 |

[a] Computed at ZORA-BLYP-D3(BJ)/QZ4Pae//ZORA-BLYP-D3(BJ)/TZ2Psc

**Table S5** Geometries of the stationary points for oxygen complexes. <sup>[a]</sup>**F<sub>2</sub>O**

E= -0.30075091 Ha

|   |             |              |             |
|---|-------------|--------------|-------------|
| O | 0.474869000 | -0.010511000 | 0.000000000 |
| F | 0.773739000 | 1.404232000  | 0.000000000 |
| F | 1.767463000 | -0.658595000 | 0.000000000 |

**F<sub>2</sub>O...ac**

E = -1.11870501 Ha

|   |              |              |              |
|---|--------------|--------------|--------------|
| O | 0.467249000  | -0.008720000 | 0.000000000  |
| F | 0.770940000  | 1.412267000  | 0.000000000  |
| F | 1.776685000  | -0.668137000 | 0.000000000  |
| C | -2.423048000 | -0.336116000 | 0.602620000  |
| C | -2.423048000 | -0.336116000 | -0.602620000 |
| H | -2.422664000 | -0.335024000 | 1.669996000  |
| H | -2.422664000 | -0.335024000 | -1.669996000 |

**F<sub>2</sub>O...et**

E= -1.43967342 Ha

|   |              |              |              |
|---|--------------|--------------|--------------|
| O | 0.501507000  | -0.062737000 | 0.000000000  |
| F | 0.778102000  | 1.367139000  | 0.000000000  |
| F | 1.834099000  | -0.706590000 | 0.000000000  |
| C | -2.320230000 | -0.198067000 | 0.668414000  |
| H | -2.342884000 | -1.123604000 | 1.239858000  |
| H | -2.296693000 | 0.727473000  | 1.239545000  |
| C | -2.320230000 | -0.198067000 | -0.668414000 |
| H | -2.296693000 | 0.727473000  | -1.239545000 |
| H | -2.342884000 | -1.123604000 | -1.239858000 |

**F<sub>2</sub>O...2but**

E= -2.31137570 Ha

|   |              |              |              |
|---|--------------|--------------|--------------|
| O | -0.573739000 | 0.147912000  | 0.000000000  |
| C | 1.922369000  | -0.174002000 | -0.607699000 |
| C | 1.922369000  | -0.174002000 | 0.607699000  |
| F | -0.806750000 | 1.600215000  | 0.000000000  |
| F | -1.966072000 | -0.496630000 | 0.000000000  |
| C | 1.931354000  | -0.165013000 | -2.064999000 |
| H | 2.959806000  | -0.176235000 | -2.448717000 |
| H | 1.409195000  | -1.041476000 | -2.468304000 |
| H | 1.435083000  | 0.733792000  | -2.451864000 |
| C | 1.931354000  | -0.165013000 | 2.064999000  |
| H | 1.409195000  | -1.041476000 | 2.468304000  |
| H | 2.959806000  | -0.176235000 | 2.448717000  |
| H | 1.435083000  | 0.733792000  | 2.451864000  |

**Cl<sub>2</sub>O**

E=-0.26463878 Ha

|    |             |              |             |
|----|-------------|--------------|-------------|
| O  | 0.413107000 | -0.041533000 | 0.000000000 |
| Cl | 0.651878000 | 1.694741000  | 0.000000000 |
| Cl | 1.920502000 | -0.935605000 | 0.000000000 |

**Cl<sub>2</sub>O...ac**

E= -1.08226418 Ha

|    |              |              |              |
|----|--------------|--------------|--------------|
| O  | 0.458498000  | -0.058004000 | 0.000000000  |
| Cl | 0.668375000  | 1.686159000  | 0.000000000  |
| Cl | 1.992381000  | -0.926570000 | 0.000000000  |
| C  | -2.570276000 | -0.326580000 | 0.602344000  |
| C  | -2.570276000 | -0.326580000 | -0.602344000 |
| H  | -2.562985000 | -0.325707000 | 1.669332000  |
| H  | -2.562985000 | -0.325707000 | -1.669332000 |

**Cl<sub>2</sub>O...et**

E= -1.40355594 Ha

|    |              |              |              |
|----|--------------|--------------|--------------|
| O  | 0.484296000  | -0.062965000 | 0.000000000  |
| Cl | 0.625139000  | 1.695380000  | 0.000000000  |
| Cl | 2.058949000  | -0.872114000 | 0.000000000  |
| C  | -2.401713000 | -0.384280000 | 0.667928000  |
| H  | -2.394376000 | -1.309924000 | 1.239365000  |
| H  | -2.401416000 | 0.541624000  | 1.238582000  |
| C  | -2.401713000 | -0.384280000 | -0.667928000 |
| H  | -2.401416000 | 0.541624000  | -1.238582000 |
| H  | -2.394376000 | -1.309924000 | -1.239365000 |

**Cl<sub>2</sub>O...2but**

E=-2.27442399 Ha

|    |              |              |              |
|----|--------------|--------------|--------------|
| O  | -0.646368000 | 0.157894000  | 0.000000000  |
| Cl | -0.732505000 | 1.923907000  | 0.000000000  |
| Cl | -2.266204000 | -0.617110000 | 0.000000000  |
| C  | 2.030055000  | -0.291037000 | -0.606410000 |
| C  | 2.030055000  | -0.291037000 | 0.606410000  |
| C  | 2.011936000  | -0.277858000 | -2.064133000 |
| H  | 3.025590000  | -0.377185000 | -2.473876000 |
| H  | 1.405737000  | -1.103262000 | -2.458157000 |
| H  | 1.586044000  | 0.661199000  | -2.440117000 |
| C  | 2.011936000  | -0.277858000 | 2.064133000  |
| H  | 1.405737000  | -1.103262000 | 2.458157000  |
| H  | 3.025590000  | -0.377185000 | 2.473876000  |
| H  | 1.586044000  | 0.661199000  | 2.440117000  |

**Br<sub>2</sub>O**

E=-0.24862694 Ha

|    |             |              |             |
|----|-------------|--------------|-------------|
| O  | 0.424678000 | -0.078557000 | 0.000000000 |
| Br | 0.611646000 | 1.807521000  | 0.000000000 |
| Br | 2.055964000 | -1.043767000 | 0.000000000 |

**Br<sub>2</sub>O•••ac**

E= -1.06666675 Ha

|    |              |              |              |
|----|--------------|--------------|--------------|
| O  | 0.411790000  | -0.064429000 | 0.000000000  |
| Br | 0.624906000  | 1.824886000  | 0.000000000  |
| Br | 2.041678000  | -1.049363000 | 0.000000000  |
| C  | -2.559411000 | -0.371003000 | 0.602445000  |
| C  | -2.559411000 | -0.371003000 | -0.602445000 |
| H  | -2.549909000 | -0.369648000 | 1.669343000  |
| H  | -2.549909000 | -0.369648000 | -1.669343000 |

**Br<sub>2</sub>O•••et**

E= -1.38836178 Ha

|    |              |              |              |
|----|--------------|--------------|--------------|
| O  | 0.425718000  | -0.054668000 | 0.000000000  |
| Br | 0.586723000  | 1.849837000  | 0.000000000  |
| Br | 2.090530000  | -0.998951000 | 0.000000000  |
| C  | -2.349204000 | -0.466844000 | 0.668589000  |
| H  | -2.259565000 | -1.388212000 | 1.239481000  |
| H  | -2.428986000 | 0.455741000  | 1.238636000  |
| C  | -2.349204000 | -0.466844000 | -0.668589000 |
| H  | -2.428986000 | 0.455741000  | -1.238636000 |
| H  | -2.259565000 | -1.388212000 | -1.239481000 |

**Br<sub>2</sub>O•••2but**

E= -2.25971276 Ha

|    |              |              |              |
|----|--------------|--------------|--------------|
| O  | -0.594832000 | 0.165155000  | 0.000000000  |
| Br | -0.692575000 | 2.079324000  | 0.000000000  |
| Br | -2.304029000 | -0.741095000 | 0.000000000  |
| C  | 2.011678000  | -0.339760000 | -0.606836000 |
| C  | 2.011678000  | -0.339760000 | 0.606836000  |
| C  | 1.993715000  | -0.325445000 | -2.063935000 |
| H  | 2.997777000  | -0.495613000 | -2.473959000 |
| H  | 1.330306000  | -1.106369000 | -2.456062000 |
| H  | 1.633689000  | 0.641199000  | -2.438510000 |
| C  | 1.993715000  | -0.325445000 | 2.063935000  |
| H  | 1.330306000  | -1.106369000 | 2.456062000  |
| H  | 2.997777000  | -0.495613000 | 2.473959000  |
| H  | 1.633689000  | 0.641199000  | 2.438510000  |

**I<sub>2</sub>O**

E= -0.24538325 Ha

|   |             |              |             |
|---|-------------|--------------|-------------|
| O | 0.396113000 | -0.074066000 | 0.000000000 |
| I | 0.552732000 | 1.973942000  | 0.000000000 |
| I | 2.115828000 | -1.197205000 | 0.000000000 |

**I<sub>2</sub>O•••ac**

E=-1.06364869 Ha

|   |              |              |              |
|---|--------------|--------------|--------------|
| O | 0.396968000  | -0.080547000 | 0.000000000  |
| I | 0.552884000  | 1.972672000  | 0.000000000  |
| I | 2.125416000  | -1.197231000 | 0.000000000  |
| C | -2.607648000 | -0.360683000 | 0.602358000  |
| C | -2.607648000 | -0.360683000 | -0.602358000 |
| H | -2.595579000 | -0.359465000 | 1.669100000  |
| H | -2.595579000 | -0.359465000 | -1.669100000 |

**I<sub>2</sub>O•••et**

E=-1.38540746 Ha

|   |              |              |              |
|---|--------------|--------------|--------------|
| O | 0.412790000  | -0.076212000 | 0.000000000  |
| I | 0.511817000  | 1.988680000  | 0.000000000  |
| I | 2.181484000  | -1.139933000 | 0.000000000  |
| C | -2.414607000 | -0.444956000 | 0.668273000  |
| H | -2.253541000 | -1.356426000 | 1.239117000  |
| H | -2.564038000 | 0.468979000  | 1.238354000  |
| C | -2.414607000 | -0.444956000 | -0.668273000 |
| H | -2.564038000 | 0.468979000  | -1.238354000 |
| H | -2.253541000 | -1.356426000 | -1.239117000 |

**I<sub>2</sub>O•••2but**

E=-2.25673036 Ha

|   |              |              |              |
|---|--------------|--------------|--------------|
| O | -0.610639000 | 0.108331000  | 0.000000000  |
| I | -0.599612000 | 2.177518000  | 0.000000000  |
| I | -2.440791000 | -0.866778000 | 0.000000000  |
| C | 2.124115000  | -0.258664000 | -0.606284000 |
| C | 2.124115000  | -0.258664000 | 0.606284000  |
| C | 2.097952000  | -0.243973000 | -2.063576000 |
| H | 3.096500000  | -0.426234000 | -2.481663000 |
| H | 1.421339000  | -1.015728000 | -2.451289000 |
| H | 1.747026000  | 0.727147000  | -2.436042000 |
| C | 2.097952000  | -0.243973000 | 2.063576000  |
| H | 1.421339000  | -1.015728000 | 2.451289000  |
| H | 3.096500000  | -0.426234000 | 2.481663000  |
| H | 1.747026000  | 0.727147000  | 2.436042000  |

[a] Computed at ZORA-BLYP-D3(BJ)/QZ4Pae//ZORA-BLYP-D3(BJ)/TZ2Psc

**Table S6** Geometries of the stationary points for sulfur complexes. <sup>[a]</sup>**F<sub>2</sub>S**

E = -0.37754084 Ha

|   |             |              |             |
|---|-------------|--------------|-------------|
| S | 0.241423000 | 0.289180000  | 0.000000000 |
| F | 0.118137000 | -1.346483000 | 0.000000000 |
| F | 1.874929000 | 0.438459000  | 0.000000000 |

**F<sub>2</sub>S...ac**

E = -1.20031061 Ha

|   |              |              |              |
|---|--------------|--------------|--------------|
| S | 0.448300000  | -0.324400000 | 0.000000000  |
| F | 0.465700000  | 1.322000000  | 0.000000000  |
| F | 2.092700000  | -0.554100000 | 0.000000000  |
| C | -2.418100000 | -0.162700000 | 0.603600000  |
| C | -2.418100000 | -0.162700000 | -0.603600000 |
| H | -2.433700000 | -0.156200000 | 1.670900000  |
| H | -2.433700000 | -0.156200000 | -1.670900000 |

**F<sub>2</sub>S...et**

E = -1.52187844 Ha

|   |              |              |              |
|---|--------------|--------------|--------------|
| S | 0.462500000  | -0.375100000 | 0.000000000  |
| F | 0.493800000  | 1.275000000  | 0.000000000  |
| F | 2.116400000  | -0.585200000 | 0.000000000  |
| C | -2.295100000 | -0.039900000 | 0.671000000  |
| H | -2.471500000 | -0.948400000 | 1.242600000  |
| H | -2.138900000 | 0.872000000  | 1.242100000  |
| C | -2.295100000 | -0.039900000 | -0.671000000 |
| H | -2.138900000 | 0.872000000  | -1.242100000 |
| H | -2.471500000 | -0.948400000 | -1.242600000 |

**F<sub>2</sub>S...2but**

E = -2.39375124 Ha

|   |              |              |              |
|---|--------------|--------------|--------------|
| S | -0.693800000 | -0.178500000 | 0.000000000  |
| F | -0.659300000 | 1.475200000  | 0.000000000  |
| F | -2.371000000 | -0.304500000 | 0.000000000  |
| C | 2.008700000  | -0.102600000 | -0.608100000 |
| C | 2.008700000  | -0.102600000 | 0.608100000  |
| C | 2.085400000  | -0.090800000 | -2.068500000 |
| H | 3.131500000  | -0.053000000 | -2.397900000 |
| H | 1.624800000  | -0.989100000 | -2.496400000 |
| H | 1.565800000  | 0.782400000  | -2.480400000 |
| C | 2.085400000  | -0.090800000 | 2.068500000  |
| H | 1.624800000  | -0.989100000 | 2.496400000  |
| H | 3.131500000  | -0.053000000 | 2.397900000  |
| H | 1.565800000  | 0.782400000  | 2.480400000  |

**Cl<sub>2</sub>S**

E = -0.26514050 Ha

|    |             |              |             |
|----|-------------|--------------|-------------|
| S  | 0.188960000 | -0.486495000 | 0.000000000 |
| Cl | 0.142198000 | 1.588921000  | 0.000000000 |
| Cl | 2.206636000 | -0.974875000 | 0.000000000 |

**Cl<sub>2</sub>S...ac**

E = -1.08618590 Ha

|    |              |              |              |
|----|--------------|--------------|--------------|
| S  | 0.172700000  | -0.493200000 | 0.000000000  |
| Cl | 0.149700000  | 1.589100000  | 0.000000000  |
| Cl | 2.214000000  | -0.969000000 | 0.000000000  |
| C  | -2.918800000 | -0.620200000 | 0.602900000  |
| C  | -2.918800000 | -0.620200000 | -0.602900000 |
| H  | -2.919000000 | -0.616500000 | 1.669900000  |
| H  | -2.919000000 | -0.616500000 | -1.669900000 |

**Cl<sub>2</sub>S...et**

E = -1.40774031 Ha

|    |              |              |              |
|----|--------------|--------------|--------------|
| S  | 0.409500000  | -0.367100000 | 0.000000000  |
| Cl | 0.470900000  | 1.718200000  | 0.000000000  |
| Cl | 2.439800000  | -0.908400000 | 0.000000000  |
| C  | -2.610700000 | -0.198400000 | 0.668800000  |
| H  | -2.770100000 | -1.110500000 | 1.240200000  |
| H  | -2.455400000 | 0.714100000  | 1.239500000  |
| C  | -2.610700000 | -0.198400000 | -0.668800000 |
| H  | -2.455400000 | 0.714100000  | -1.239500000 |
| H  | -2.770100000 | -1.110500000 | -1.240200000 |

**Cl<sub>2</sub>S...2but**

E = -2.28002547 Ha

|    |              |              |              |
|----|--------------|--------------|--------------|
| S  | -0.644300000 | -0.173000000 | 0.000000000  |
| Cl | -0.603800000 | 1.915500000  | 0.000000000  |
| Cl | -2.724900000 | -0.605800000 | 0.000000000  |
| C  | 2.212000000  | -0.202800000 | -0.607100000 |
| C  | 2.212000000  | -0.202800000 | 0.607100000  |
| C  | 2.228600000  | -0.179700000 | -2.068000000 |
| H  | 3.256300000  | -0.112900000 | -2.446200000 |
| H  | 1.771700000  | -1.085900000 | -2.483700000 |
| H  | 1.668400000  | 0.683400000  | -2.448600000 |
| C  | 2.228600000  | -0.179700000 | 2.068000000  |
| H  | 1.771700000  | -1.085900000 | 2.483700000  |
| H  | 3.256300000  | -0.112900000 | 2.446200000  |
| H  | 1.668400000  | 0.683400000  | 2.448600000  |

**Br<sub>2</sub>S**

E = -0.23463753 Ha

|    |             |              |             |
|----|-------------|--------------|-------------|
| S  | 0.273248000 | -0.395957000 | 0.000000000 |
| Br | 0.221818000 | 1.848629000  | 0.000000000 |
| Br | 2.443631000 | -0.970689000 | 0.000000000 |

### Br<sub>2</sub>S•••ac

E = -1.05566517 Ha

|    |              |              |              |
|----|--------------|--------------|--------------|
| S  | 0.254000000  | -0.403700000 | 0.000000000  |
| Br | 0.226300000  | 1.848100000  | 0.000000000  |
| Br | 2.447000000  | -0.967000000 | 0.000000000  |
| C  | -2.852700000 | -0.648700000 | 0.602900000  |
| C  | -2.852700000 | -0.648700000 | -0.602900000 |
| H  | -2.852800000 | -0.645600000 | 1.669800000  |
| H  | -2.852800000 | -0.645600000 | -1.669800000 |

### Br<sub>2</sub>S•••et

E = -1.37745878 Ha

|    |              |              |              |
|----|--------------|--------------|--------------|
| S  | 0.301500000  | -0.415400000 | 0.000000000  |
| Br | 0.335100000  | 1.839000000  | 0.000000000  |
| Br | 2.488000000  | -1.019200000 | 0.000000000  |
| C  | -2.713000000 | -0.359500000 | 0.669000000  |
| H  | -2.827000000 | -1.278200000 | 1.240500000  |
| H  | -2.599000000 | 0.559300000  | 1.239400000  |
| C  | -2.713000000 | -0.359500000 | -0.669000000 |
| H  | -2.599000000 | 0.559300000  | -1.239400000 |
| H  | -2.827000000 | -1.278200000 | -1.240500000 |

### Br<sub>2</sub>S•••2but

E = -2.24994313 Ha

|    |              |              |              |
|----|--------------|--------------|--------------|
| S  | -0.544900000 | -0.208400000 | 0.000000000  |
| Br | -0.485500000 | 2.049500000  | 0.000000000  |
| Br | -2.781200000 | -0.720700000 | 0.000000000  |
| C  | 2.315700000  | -0.323200000 | -0.607300000 |
| C  | 2.315700000  | -0.323200000 | 0.607300000  |
| C  | 2.334000000  | -0.301000000 | -2.067900000 |
| H  | 3.362000000  | -0.229100000 | -2.444500000 |
| H  | 1.882400000  | -1.209800000 | -2.483600000 |
| H  | 1.769700000  | 0.559100000  | -2.449100000 |
| C  | 2.334000000  | -0.301000000 | 2.067900000  |
| H  | 1.882400000  | -1.209800000 | 2.483600000  |
| H  | 3.362000000  | -0.229100000 | 2.444500000  |
| H  | 1.769700000  | 0.559100000  | 2.449100000  |

### I<sub>2</sub>S

E = -0.21167251 Ha

|   |             |              |             |
|---|-------------|--------------|-------------|
| S | 0.224145000 | -0.455154000 | 0.000000000 |
| I | 0.126750000 | 1.993448000  | 0.000000000 |
| I | 2.589656000 | -1.095043000 | 0.000000000 |

### I<sub>2</sub>S•••ac

E = -1.03229559 Ha

|   |              |              |              |
|---|--------------|--------------|--------------|
| S | 0.208300000  | -0.462300000 | 0.000000000  |
| I | 0.129200000  | 1.993200000  | 0.000000000  |
| I | 2.591300000  | -1.093000000 | 0.000000000  |
| C | -2.939800000 | -0.634800000 | 0.602600000  |
| C | -2.939800000 | -0.634800000 | -0.602600000 |
| H | -2.936300000 | -0.630400000 | 1.669800000  |
| H | -2.936300000 | -0.630400000 | -1.669800000 |

### I<sub>2</sub>S•••et

E = -1.35412334 Ha

|   |              |              |              |
|---|--------------|--------------|--------------|
| S | 0.223700000  | -0.489000000 | 0.000000000  |
| I | 0.192400000  | 1.973100000  | 0.000000000  |
| I | 2.602300000  | -1.158100000 | 0.000000000  |
| C | -2.859700000 | -0.476500000 | 0.668600000  |
| H | -2.978400000 | -1.394500000 | 1.240400000  |
| H | -2.740900000 | 0.442000000  | 1.238400000  |
| C | -2.859700000 | -0.476500000 | -0.668600000 |
| H | -2.740900000 | 0.442000000  | -1.238400000 |
| H | -2.978400000 | -1.394500000 | -1.240400000 |

### I<sub>2</sub>S•••2but

E = -2.22663862 Ha

|   |              |              |              |
|---|--------------|--------------|--------------|
| S | -0.468300000 | -0.298000000 | 0.000000000  |
| I | -0.327400000 | 2.159600000  | 0.000000000  |
| I | -2.903300000 | -0.840400000 | 0.000000000  |
| C | 2.418500000  | -0.394600000 | -0.607300000 |
| C | 2.418500000  | -0.394600000 | 0.607300000  |
| C | 2.418900000  | -0.363200000 | -2.067500000 |
| H | 3.443100000  | -0.365500000 | -2.460500000 |
| H | 1.892600000  | -1.231600000 | -2.481800000 |
| H | 1.914800000  | 0.540600000  | -2.433200000 |
| C | 2.418900000  | -0.363200000 | 2.067500000  |
| H | 1.892600000  | -1.231600000 | 2.481800000  |
| H | 3.443100000  | -0.365500000 | 2.460500000  |
| H | 1.914800000  | 0.540600000  | 2.433200000  |

[a] Computed at ZORA-BLYP-D3(BJ)/QZ4Pae//ZORA-BLYP-D3(BJ)/TZ2Psc



**Table S7** Geometries of the stationary points for selenium complexes. <sup>[a]</sup>**F<sub>2</sub>Se**

E = -0.25373249 Ha

E = -0.36081381 Ha

|    |             |              |             |
|----|-------------|--------------|-------------|
| Se | 0.206812000 | 0.320676000  | 0.000000000 |
| F  | 0.111500000 | -1.463448000 | 0.000000000 |
| F  | 1.989002000 | 0.447251000  | 0.000000000 |

|    |              |              |             |
|----|--------------|--------------|-------------|
| Se | 0.127323000  | 0.399685000  | 0.000000000 |
| Cl | -0.083025000 | -1.804943000 | 0.000000000 |
| Cl | 2.327743000  | 0.650181000  | 0.000000000 |

**Cl<sub>2</sub>Se•••ac**

E = -1.07817812 Ha

**F<sub>2</sub>Se•••ac**

E = -1.18867680 Ha

|    |              |              |              |
|----|--------------|--------------|--------------|
| Se | 0.403300000  | -0.361900000 | 0.000000000  |
| F  | 0.453000000  | 1.432200000  | 0.000000000  |
| F  | 2.211700000  | -0.559600000 | 0.000000000  |
| C  | -2.280400000 | -0.161800000 | 0.605900000  |
| C  | -2.280400000 | -0.161800000 | -0.605900000 |
| H  | -2.335800000 | -0.144800000 | 1.672500000  |
| H  | -2.335800000 | -0.144800000 | -1.672500000 |

|    |              |              |              |
|----|--------------|--------------|--------------|
| Se | 0.338200000  | -0.354500000 | 0.000000000  |
| Cl | 0.438400000  | 1.865900000  | 0.000000000  |
| Cl | 2.514100000  | -0.897400000 | 0.000000000  |
| C  | -2.613200000 | -0.347700000 | 0.603800000  |
| C  | -2.613200000 | -0.347700000 | -0.603800000 |
| H  | -2.631000000 | -0.340600000 | 1.671500000  |
| H  | -2.631000000 | -0.340600000 | -1.671500000 |

**Cl<sub>2</sub>Se•••et**

E = -1.40064794 Ha

**F<sub>2</sub>Se•••et**

E = -1.51164808 Ha

|    |              |              |              |
|----|--------------|--------------|--------------|
| Se | 0.399800000  | -0.409800000 | 0.000000000  |
| F  | 0.466300000  | 1.387600000  | 0.000000000  |
| F  | 2.224800000  | -0.566900000 | 0.000000000  |
| C  | -2.168300000 | -0.030400000 | 0.677300000  |
| H  | -2.389500000 | -0.929800000 | 1.247100000  |
| H  | -2.008900000 | 0.881300000  | 1.246400000  |
| C  | -2.168300000 | -0.030400000 | -0.677300000 |
| H  | -2.008900000 | 0.881300000  | -1.246400000 |
| H  | -2.389500000 | -0.929800000 | -1.247100000 |

|    |              |              |              |
|----|--------------|--------------|--------------|
| Se | 0.358200000  | -0.405600000 | 0.000000000  |
| Cl | 0.461300000  | 1.820200000  | 0.000000000  |
| Cl | 2.550700000  | -0.934200000 | 0.000000000  |
| C  | -2.499000000 | -0.197700000 | 0.671700000  |
| H  | -2.653100000 | -1.110700000 | 1.242600000  |
| H  | -2.366500000 | 0.718500000  | 1.241500000  |
| C  | -2.499000000 | -0.197700000 | -0.671700000 |
| H  | -2.366500000 | 0.718500000  | -1.241500000 |
| H  | -2.653100000 | -1.110700000 | -1.242600000 |

**Cl<sub>2</sub>Se•••2but**

E = -2.27336893 Ha

**F<sub>2</sub>Se•••2but**

E = -2.38348276 Ha

|    |              |              |              |
|----|--------------|--------------|--------------|
| Se | -0.651700000 | -0.237100000 | 0.000000000  |
| F  | -0.612000000 | 1.565000000  | 0.000000000  |
| F  | -2.486900000 | -0.312900000 | 0.000000000  |
| C  | 1.967700000  | -0.116000000 | -0.609900000 |
| C  | 1.967700000  | -0.116000000 | 0.609900000  |
| C  | 2.112900000  | -0.071300000 | -2.064100000 |
| H  | 3.173000000  | 0.019900000  | -2.335500000 |
| H  | 1.714000000  | -0.978500000 | -2.532600000 |
| H  | 1.574900000  | 0.788700000  | -2.480100000 |
| C  | 2.112900000  | -0.071300000 | 2.064100000  |
| H  | 1.714000000  | -0.978500000 | 2.532600000  |
| H  | 3.173000000  | 0.019900000  | 2.335500000  |
| H  | 1.574900000  | 0.788700000  | 2.480100000  |

|    |              |              |              |
|----|--------------|--------------|--------------|
| Se | -0.619400000 | -0.225300000 | 0.000000000  |
| Cl | -0.583800000 | 2.004200000  | 0.000000000  |
| Cl | -2.855800000 | -0.611100000 | 0.000000000  |
| C  | 2.180700000  | -0.221200000 | -0.608000000 |
| C  | 2.180700000  | -0.221200000 | 0.608000000  |
| C  | 2.257100000  | -0.182600000 | -2.065800000 |
| H  | 3.302700000  | -0.109600000 | -2.392400000 |
| H  | 1.821700000  | -1.084700000 | -2.512100000 |
| H  | 1.713500000  | 0.685200000  | -2.459100000 |
| C  | 2.257100000  | -0.182600000 | 2.065800000  |
| H  | 1.821700000  | -1.084700000 | 2.512100000  |
| H  | 3.302700000  | -0.109600000 | 2.392400000  |
| H  | 1.713500000  | 0.685200000  | 2.459100000  |

**Br<sub>2</sub>Se**

E = -0.22461022 Ha

**Cl<sub>2</sub>Se**

|    |              |              |             |
|----|--------------|--------------|-------------|
| Se | 0.049581000  | 0.478311000  | 0.000000000 |
| Br | -0.208830000 | -1.883183000 | 0.000000000 |
| Br | 2.406299000  | 0.777179000  | 0.000000000 |

**Br<sub>2</sub>Se•••ac**

E = -1.04855899 Ha

|    |              |              |              |
|----|--------------|--------------|--------------|
| Se | 0.242700000  | -0.408800000 | 0.000000000  |
| Br | 0.301700000  | 1.972300000  | 0.000000000  |
| Br | 2.566400000  | -1.003900000 | 0.000000000  |
| C  | -2.740200000 | -0.517700000 | 0.603600000  |
| C  | -2.740200000 | -0.517700000 | -0.603600000 |
| H  | -2.754700000 | -0.511600000 | 1.671300000  |
| H  | -2.754700000 | -0.511600000 | -1.671300000 |

**Br<sub>2</sub>Se•••et**

E = -1.37110606 Ha

|    |              |              |              |
|----|--------------|--------------|--------------|
| Se | 0.263600000  | -0.455500000 | 0.000000000  |
| Br | 0.329100000  | 1.932000000  | 0.000000000  |
| Br | 2.601100000  | -1.046700000 | 0.000000000  |
| C  | -2.629300000 | -0.361100000 | 0.671500000  |
| H  | -2.742000000 | -1.280100000 | 1.242600000  |
| H  | -2.534600000 | 0.560000000  | 1.241100000  |
| C  | -2.629300000 | -0.361100000 | -0.671500000 |
| H  | -2.534600000 | 0.560000000  | -1.241100000 |
| H  | -2.742000000 | -1.280100000 | -1.242600000 |

**Br<sub>2</sub>Se•••2but**

E = -2.24393846 Ha

|    |              |              |              |
|----|--------------|--------------|--------------|
| Se | -0.543700000 | -0.258900000 | 0.000000000  |
| Br | -0.462400000 | 2.128500000  | 0.000000000  |
| Br | -2.928500000 | -0.701700000 | 0.000000000  |
| C  | 2.278400000  | -0.334400000 | -0.607900000 |
| C  | 2.278400000  | -0.334400000 | 0.607900000  |
| C  | 2.348500000  | -0.297600000 | -2.065700000 |
| H  | 3.393200000  | -0.239400000 | -2.397800000 |
| H  | 1.898200000  | -1.193700000 | -2.509300000 |
| H  | 1.815000000  | 0.577800000  | -2.456400000 |
| C  | 2.348500000  | -0.297600000 | 2.065700000  |
| H  | 1.898200000  | -1.193700000 | 2.509300000  |
| H  | 3.393200000  | -0.239400000 | 2.397800000  |
| H  | 1.815000000  | 0.577800000  | 2.456400000  |

**I<sub>2</sub>Se**

E = -0.20068295 Ha

|    |             |              |             |
|----|-------------|--------------|-------------|
| Se | 0.181444000 | -0.475156000 | 0.000000000 |
| I  | 0.151863000 | 2.100747000  | 0.000000000 |
| I  | 2.669537000 | -1.142694000 | 0.000000000 |

**I<sub>2</sub>Se•••ac**

E = -1.02352248 Ha

|    |              |              |              |
|----|--------------|--------------|--------------|
| Se | 0.160800000  | -0.484600000 | 0.000000000  |
| I  | 0.158700000  | 2.101300000  | 0.000000000  |
| I  | 2.675700000  | -1.137300000 | 0.000000000  |
| C  | -2.906800000 | -0.632000000 | 0.603300000  |
| C  | -2.906800000 | -0.632000000 | -0.603300000 |
| H  | -2.914500000 | -0.626000000 | 1.670800000  |
| H  | -2.914500000 | -0.626000000 | -1.670800000 |

**I<sub>2</sub>Se•••et**

E = -1.34599555 Ha

|    |              |              |              |
|----|--------------|--------------|--------------|
| Se | 0.183500000  | -0.527100000 | 0.000000000  |
| I  | 0.189500000  | 2.065800000  | 0.000000000  |
| I  | 2.707800000  | -1.181700000 | 0.000000000  |
| C  | -2.800600000 | -0.486100000 | 0.670500000  |
| H  | -2.903700000 | -1.406000000 | 1.241900000  |
| H  | -2.707900000 | 0.435600000  | 1.239600000  |
| C  | -2.800600000 | -0.486100000 | -0.670500000 |
| H  | -2.707900000 | 0.435600000  | -1.239600000 |
| H  | -2.903700000 | -1.406000000 | -1.241900000 |

**I<sub>2</sub>Se•••2but**

E = -2.21881472 Ha

|    |              |              |              |
|----|--------------|--------------|--------------|
| Se | -0.477900000 | -0.324600000 | 0.000000000  |
| I  | -0.323700000 | 2.261000000  | 0.000000000  |
| I  | -3.052800000 | -0.821000000 | 0.000000000  |
| C  | 2.420100000  | -0.424300000 | -0.607400000 |
| C  | 2.420100000  | -0.424300000 | 0.607400000  |
| C  | 2.467600000  | -0.385900000 | -2.065400000 |
| H  | 3.506200000  | -0.330700000 | -2.416600000 |
| H  | 2.006300000  | -1.279400000 | -2.503100000 |
| H  | 1.930600000  | 0.492200000  | -2.445900000 |
| C  | 2.467600000  | -0.385900000 | 2.065400000  |
| H  | 2.006300000  | -1.279400000 | 2.503100000  |
| H  | 3.506200000  | -0.330700000 | 2.416600000  |
| H  | 1.930600000  | 0.492200000  | 2.445900000  |

[a] Computed at ZORA-BLYP-D3(BJ)/QZ4Pae//ZORA-BLYP-D3(BJ)/TZ2Psc

**Table S8** Geometries of the stationary points for tellurium complexes. <sup>[a]</sup>**F<sub>2</sub>Te**

E = -0.25351206 Ha

E = -0.36908760 Ha

|    |             |              |             |
|----|-------------|--------------|-------------|
| Te | 0.192762000 | 0.333544000  | 0.000000000 |
| F  | 0.114787000 | -1.608497000 | 0.000000000 |
| F  | 2.133078000 | 0.446787000  | 0.000000000 |

|    |              |              |             |
|----|--------------|--------------|-------------|
| Te | 0.117323000  | 0.407479000  | 0.000000000 |
| Cl | -0.068756000 | -1.971774000 | 0.000000000 |
| Cl | 2.492121000  | 0.643859000  | 0.000000000 |

**Cl<sub>2</sub>Te•••ac**

E = -1.08029858 Ha

**F<sub>2</sub>Te•••ac**

E = -1.19998570 Ha

|    |              |              |              |
|----|--------------|--------------|--------------|
| Te | 0.423300000  | -0.404900000 | 0.000000000  |
| F  | 0.418800000  | 1.545500000  | 0.000000000  |
| F  | 2.398400000  | -0.441000000 | 0.000000000  |
| C  | -2.325800000 | -0.083700000 | 0.607500000  |
| C  | -2.325800000 | -0.083700000 | -0.607500000 |
| H  | -2.414400000 | -0.056500000 | 1.671800000  |
| H  | -2.414400000 | -0.056500000 | -1.671800000 |

|    |              |              |              |
|----|--------------|--------------|--------------|
| Te | 0.338900000  | -0.423900000 | 0.000000000  |
| Cl | 0.422200000  | 1.971600000  | 0.000000000  |
| Cl | 2.724400000  | -0.831000000 | 0.000000000  |
| C  | -2.664800000 | -0.183900000 | 0.604500000  |
| C  | -2.664800000 | -0.183900000 | -0.604500000 |
| H  | -2.696700000 | -0.170700000 | 1.672000000  |
| H  | -2.696700000 | -0.170700000 | -1.672000000 |

**Cl<sub>2</sub>Te•••et**

E = -1.40348349 Ha

**F<sub>2</sub>Te•••et**

E = -1.52411312 Ha

|    |              |              |              |
|----|--------------|--------------|--------------|
| Te | 0.416000000  | -0.453500000 | 0.000000000  |
| F  | 0.433400000  | 1.500700000  | 0.000000000  |
| F  | 2.399300000  | -0.435700000 | 0.000000000  |
| C  | -2.225900000 | 0.067800000  | 0.680600000  |
| H  | -2.509900000 | -0.814000000 | 1.250000000  |
| H  | -2.027200000 | 0.973400000  | 1.247000000  |
| C  | -2.225900000 | 0.067800000  | -0.680600000 |
| H  | -2.027200000 | 0.973400000  | -1.247000000 |
| H  | -2.509900000 | -0.814000000 | -1.250000000 |

|    |              |              |              |
|----|--------------|--------------|--------------|
| Te | 0.354800000  | -0.477900000 | 0.000000000  |
| Cl | 0.444600000  | 1.923300000  | 0.000000000  |
| Cl | 2.758900000  | -0.849600000 | 0.000000000  |
| C  | -2.534800000 | -0.043000000 | 0.673800000  |
| H  | -2.765700000 | -0.939500000 | 1.244700000  |
| H  | -2.341700000 | 0.862900000  | 1.242500000  |
| C  | -2.534800000 | -0.043000000 | -0.673800000 |
| H  | -2.341700000 | 0.862900000  | -1.242500000 |
| H  | -2.765700000 | -0.939500000 | -1.244700000 |

**Cl<sub>2</sub>Te•••2but**

E = -2.27589722 Ha

**F<sub>2</sub>Te•••2but**

E = -2.39476081 Ha

|    |              |              |              |
|----|--------------|--------------|--------------|
| Te | -0.678500000 | -0.292400000 | 0.000000000  |
| F  | -0.562800000 | 1.661800000  | 0.000000000  |
| F  | -2.662100000 | -0.182200000 | 0.000000000  |
| C  | 2.053100000  | -0.072300000 | -0.610900000 |
| C  | 2.053100000  | -0.072300000 | 0.610900000  |
| C  | 2.237700000  | -0.011900000 | -2.061500000 |
| H  | 3.304200000  | 0.101200000  | -2.298500000 |
| H  | 1.868800000  | -0.920800000 | -2.549900000 |
| H  | 1.696600000  | 0.842500000  | -2.484300000 |
| C  | 2.237700000  | -0.011900000 | 2.061500000  |
| H  | 1.868800000  | -0.920800000 | 2.549900000  |
| H  | 3.304200000  | 0.101200000  | 2.298500000  |
| H  | 1.696600000  | 0.842500000  | 2.484300000  |

|    |              |              |              |
|----|--------------|--------------|--------------|
| Te | -0.629800000 | -0.315100000 | 0.000000000  |
| Cl | -0.543500000 | 2.087500000  | 0.000000000  |
| Cl | -3.062300000 | -0.518800000 | 0.000000000  |
| C  | 2.265900000  | -0.138400000 | -0.608600000 |
| C  | 2.265900000  | -0.138400000 | 0.608600000  |
| C  | 2.371800000  | -0.085300000 | -2.065100000 |
| H  | 3.422700000  | 0.021800000  | -2.364800000 |
| H  | 1.973400000  | -0.995100000 | -2.529200000 |
| H  | 1.811900000  | 0.770100000  | -2.462300000 |
| C  | 2.371800000  | -0.085300000 | 2.065100000  |
| H  | 1.973400000  | -0.995100000 | 2.529200000  |
| H  | 3.422700000  | 0.021800000  | 2.364800000  |
| H  | 1.811900000  | 0.770100000  | 2.462300000  |

**Br<sub>2</sub>Te**

E = -0.22222590 Ha

**Cl<sub>2</sub>Te**

|    |              |              |             |
|----|--------------|--------------|-------------|
| Te | 0.026712000  | 0.497913000  | 0.000000000 |
| Br | -0.212513000 | -2.040307000 | 0.000000000 |
| Br | 2.559568000  | 0.788336000  | 0.000000000 |

### Br<sub>2</sub>Te•••ac

E = -1.04814302 Ha

|    |              |              |              |
|----|--------------|--------------|--------------|
| Te | 0.225200000  | -0.489900000 | 0.000000000  |
| Br | 0.302000000  | 2.066200000  | 0.000000000  |
| Br | 2.755400000  | -0.981500000 | 0.000000000  |
| C  | -2.830900000 | -0.312600000 | 0.604200000  |
| C  | -2.830900000 | -0.312600000 | -0.604200000 |
| H  | -2.856400000 | -0.301400000 | 1.671800000  |
| H  | -2.856400000 | -0.301400000 | -1.671800000 |

### Br<sub>2</sub>Te•••et

E = -1.37120309 Ha

|    |              |              |              |
|----|--------------|--------------|--------------|
| Te | 0.243300000  | -0.543800000 | 0.000000000  |
| Br | 0.325100000  | 2.018800000  | 0.000000000  |
| Br | 2.791300000  | -1.007200000 | 0.000000000  |
| C  | -2.703600000 | -0.164500000 | 0.673000000  |
| H  | -2.915400000 | -1.065700000 | 1.244000000  |
| H  | -2.522200000 | 0.743900000  | 1.241600000  |
| C  | -2.703600000 | -0.164500000 | -0.673000000 |
| H  | -2.522200000 | 0.743900000  | -1.241600000 |
| H  | -2.915400000 | -1.065700000 | -1.244000000 |

### Br<sub>2</sub>Te•••2but

E = -2.24385961 Ha

|    |              |              |              |
|----|--------------|--------------|--------------|
| Te | 0.011500000  | -0.562700000 | 0.000000000  |
| Br | -0.596100000 | 1.928400000  | 0.000000000  |
| Br | 2.600500000  | -0.335200000 | 0.000000000  |
| C  | -2.895800000 | -0.991800000 | 0.608300000  |
| C  | -2.895800000 | -0.991800000 | -0.608300000 |
| C  | -2.995300000 | -0.962000000 | 2.065400000  |
| H  | -4.042900000 | -1.064700000 | 2.376900000  |
| H  | -2.420300000 | -1.775700000 | 2.522600000  |
| H  | -2.610700000 | -0.013300000 | 2.459100000  |
| C  | -2.995300000 | -0.962000000 | -2.065400000 |
| H  | -2.420300000 | -1.775700000 | -2.522600000 |
| H  | -4.042900000 | -1.064700000 | -2.376900000 |
| H  | -2.610700000 | -0.013300000 | -2.459100000 |

### I<sub>2</sub>Te

E = -0.19435102 Ha

|    |              |              |             |
|----|--------------|--------------|-------------|
| Te | -0.070910000 | 0.596828000  | 0.000000000 |
| I  | -0.349688000 | -2.149737000 | 0.000000000 |
| I  | 2.670499000  | 0.922413000  | 0.000000000 |

### I<sub>2</sub>Te•••ac

E = -1.01887095 Ha

|    |              |              |              |
|----|--------------|--------------|--------------|
| Te | 0.120900000  | -0.562700000 | 0.000000000  |
| I  | 0.168500000  | 2.207300000  | 0.000000000  |
| I  | 2.845700000  | -1.143600000 | 0.000000000  |
| C  | -3.031900000 | -0.429600000 | 0.603600000  |
| C  | -3.031900000 | -0.429600000 | -0.603600000 |
| H  | -3.047800000 | -0.420200000 | 1.671200000  |
| H  | -3.047800000 | -0.420200000 | -1.671200000 |

### I<sub>2</sub>Te•••et

E = -1.34172275 Ha

|    |              |              |              |
|----|--------------|--------------|--------------|
| Te | 0.141700000  | -0.613600000 | 0.000000000  |
| I  | 0.191600000  | 2.163000000  | 0.000000000  |
| I  | 2.881400000  | -1.176200000 | 0.000000000  |
| C  | -2.904200000 | -0.279800000 | 0.671600000  |
| H  | -3.102700000 | -1.183700000 | 1.243100000  |
| H  | -2.725100000 | 0.629400000  | 1.240000000  |
| C  | -2.904200000 | -0.279800000 | -0.671600000 |
| H  | -2.725100000 | 0.629400000  | -1.240000000 |
| H  | -3.102700000 | -1.183700000 | -1.243100000 |

### I<sub>2</sub>Te•••2but

E = -2.21458402 Ha

|    |              |              |              |
|----|--------------|--------------|--------------|
| Te | -0.513800000 | -0.395300000 | 0.011800000  |
| I  | -0.243200000 | 2.366600000  | -0.032100000 |
| I  | -3.309800000 | -0.644000000 | 0.009200000  |
| C  | 2.496800000  | -0.342800000 | -0.582900000 |
| C  | 2.492900000  | -0.432000000 | 0.629100000  |
| C  | 2.567800000  | -0.184200000 | -2.032600000 |
| H  | 3.612000000  | -0.084000000 | -2.356200000 |
| H  | 2.129200000  | -1.044900000 | -2.551400000 |
| H  | 2.023200000  | 0.714700000  | -2.347700000 |
| C  | 2.562600000  | -0.497900000 | 2.086200000  |
| H  | 2.112500000  | -1.422300000 | 2.467600000  |
| H  | 3.607600000  | -0.463200000 | 2.421000000  |
| H  | 2.029500000  | 0.348000000  | 2.537600000  |

[a] Computed at ZORA-BLYP-D3(BJ)/QZ4Pae//ZORA-BLYP-D3(BJ)/TZ2Psc
